# Supplementary material for: Functionalised diimidazolium salts: the anion effect on the catalytic ability
Source: Royal Society of Chemistry journal article supplement (doi:10.1039/c6ra12037g), 2016-01-01

## Supporting Information of

### Functionalised diimidazolium salts: the anion effect on the catalytic ability

Carla Rizzo, Francesca D'Anna,\* Renato Noto

Università degli Studi di Palermo, Dipartimento STEBICEF, Sezione di Chimica, Viale delle Scienze, Parco d'Orleans II, 90128 Palermo, Italy.

Email corresponding author: francesca.danna@unipa.it; Fax: +39-091589625; Tel: +39-09123897540

All NMR spectra were recorded at 300 MHz dissolving the TSDILs in dms<sub>o</sub>-d<sub>6</sub> solutions.

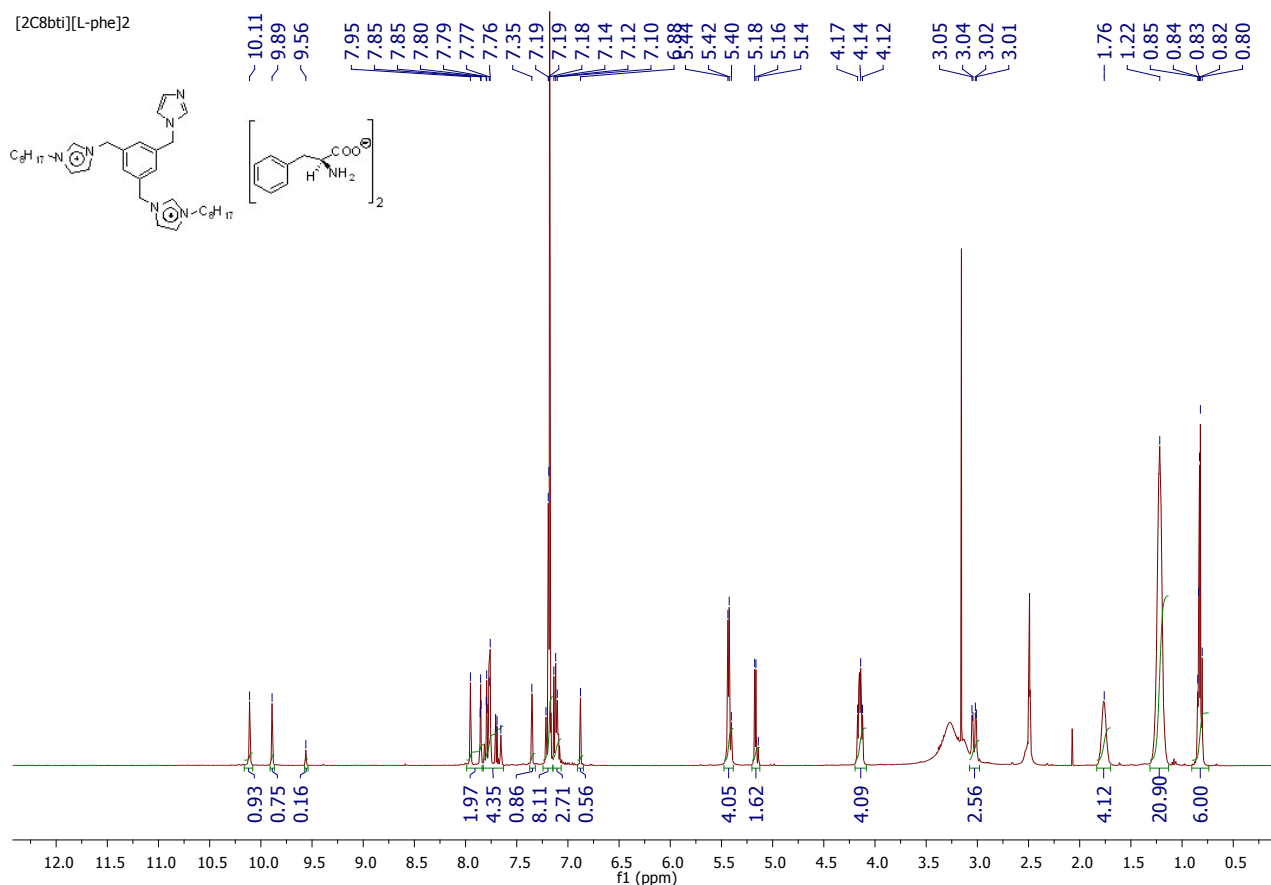

[2C8bti][L-phe]2

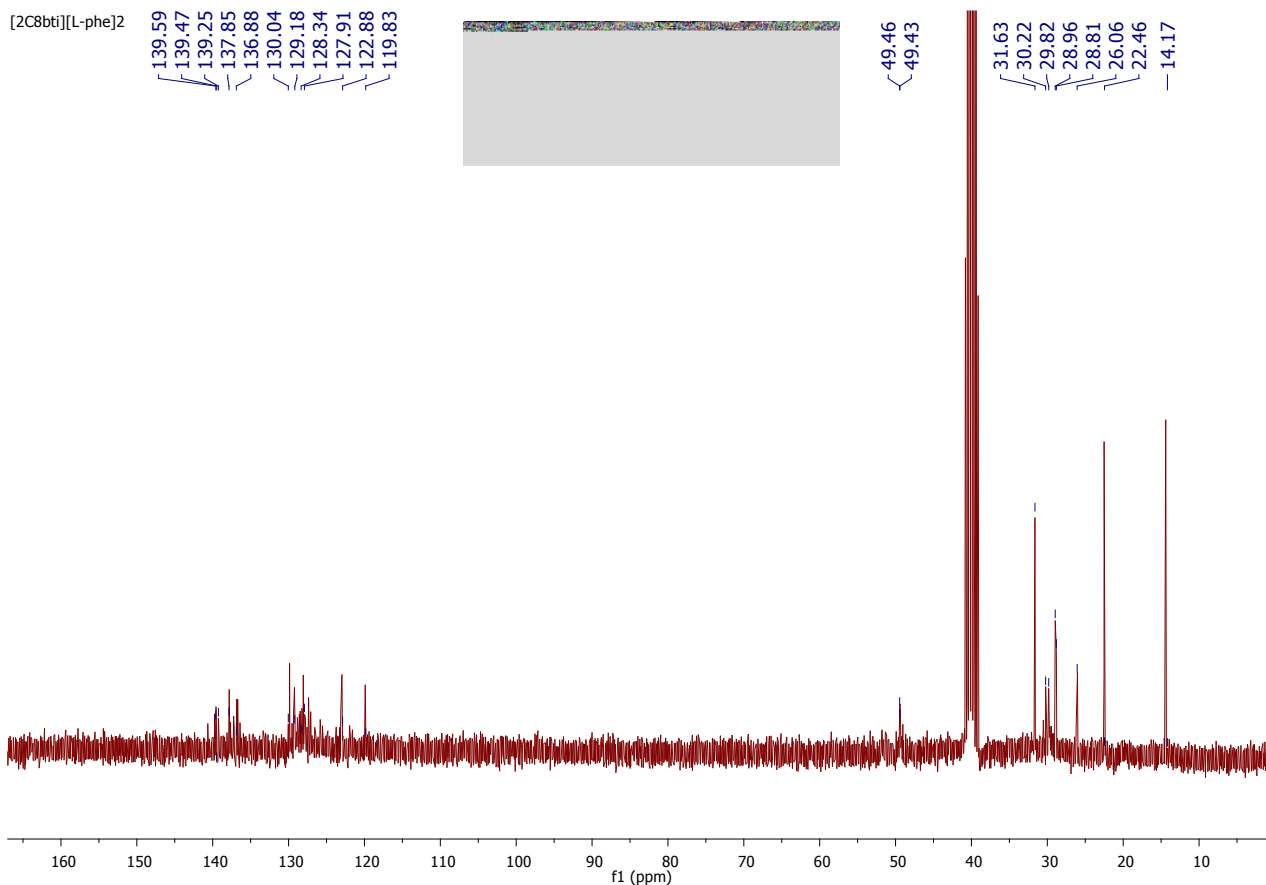

[2C8bti][L-pro]2

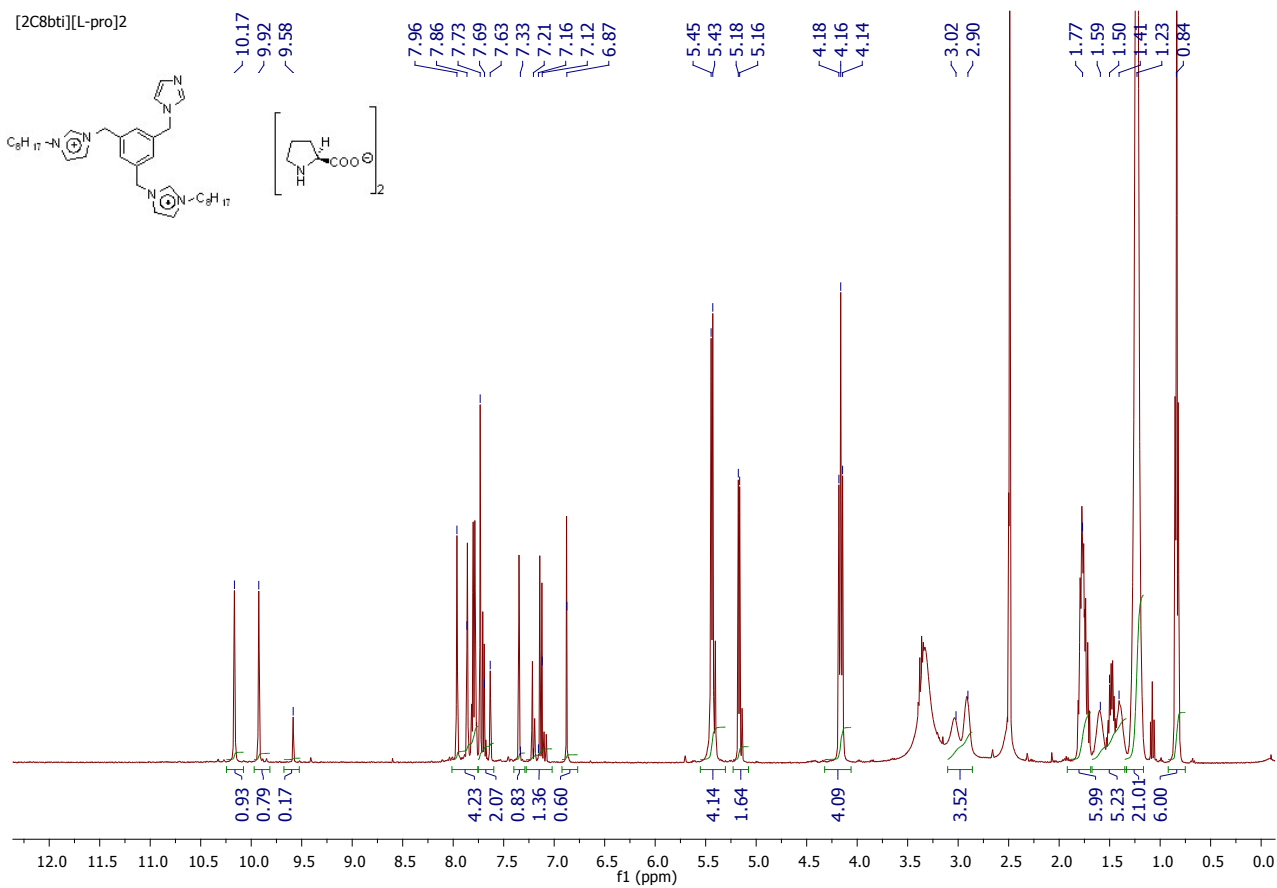

[2C8bti][L-pro]2

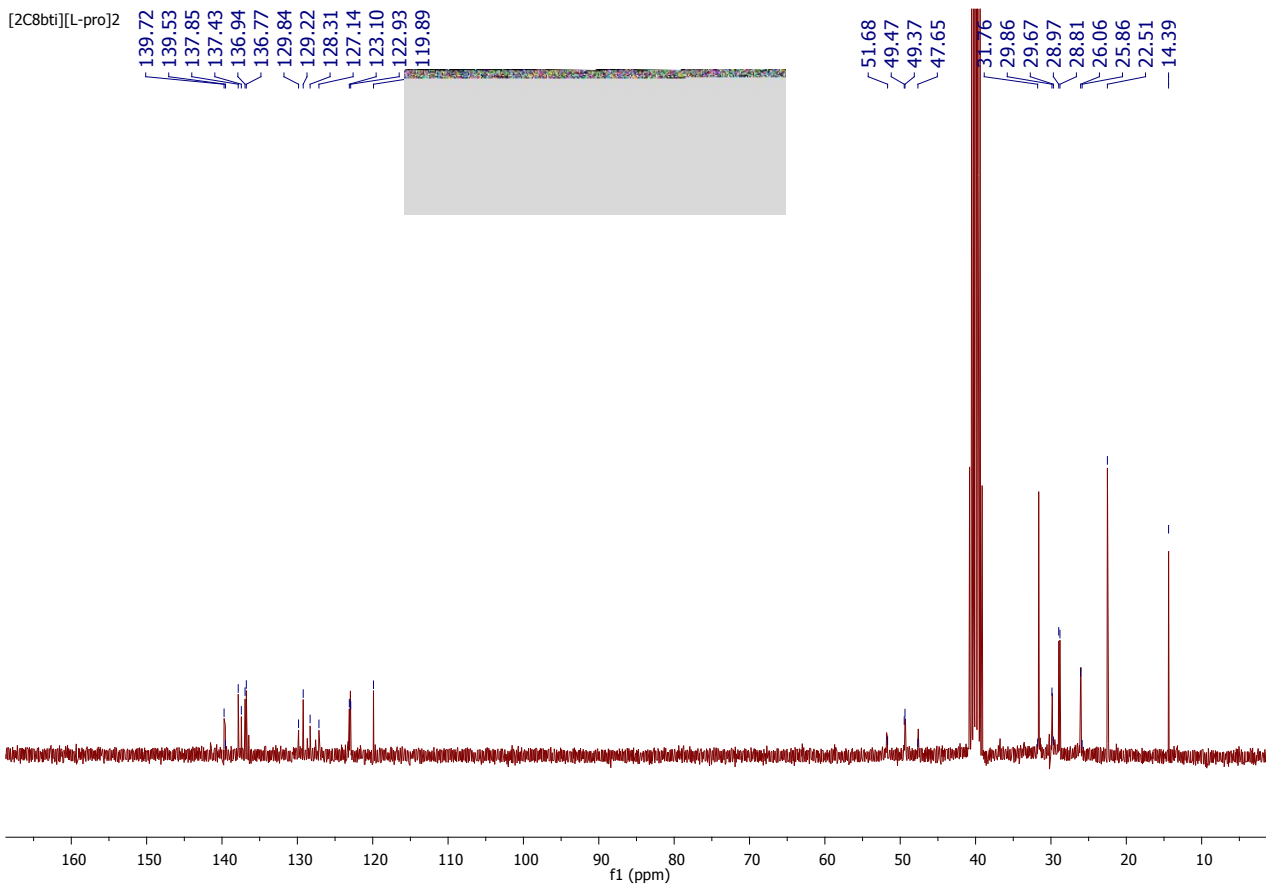

[2C8bti][R-BNphosph]2

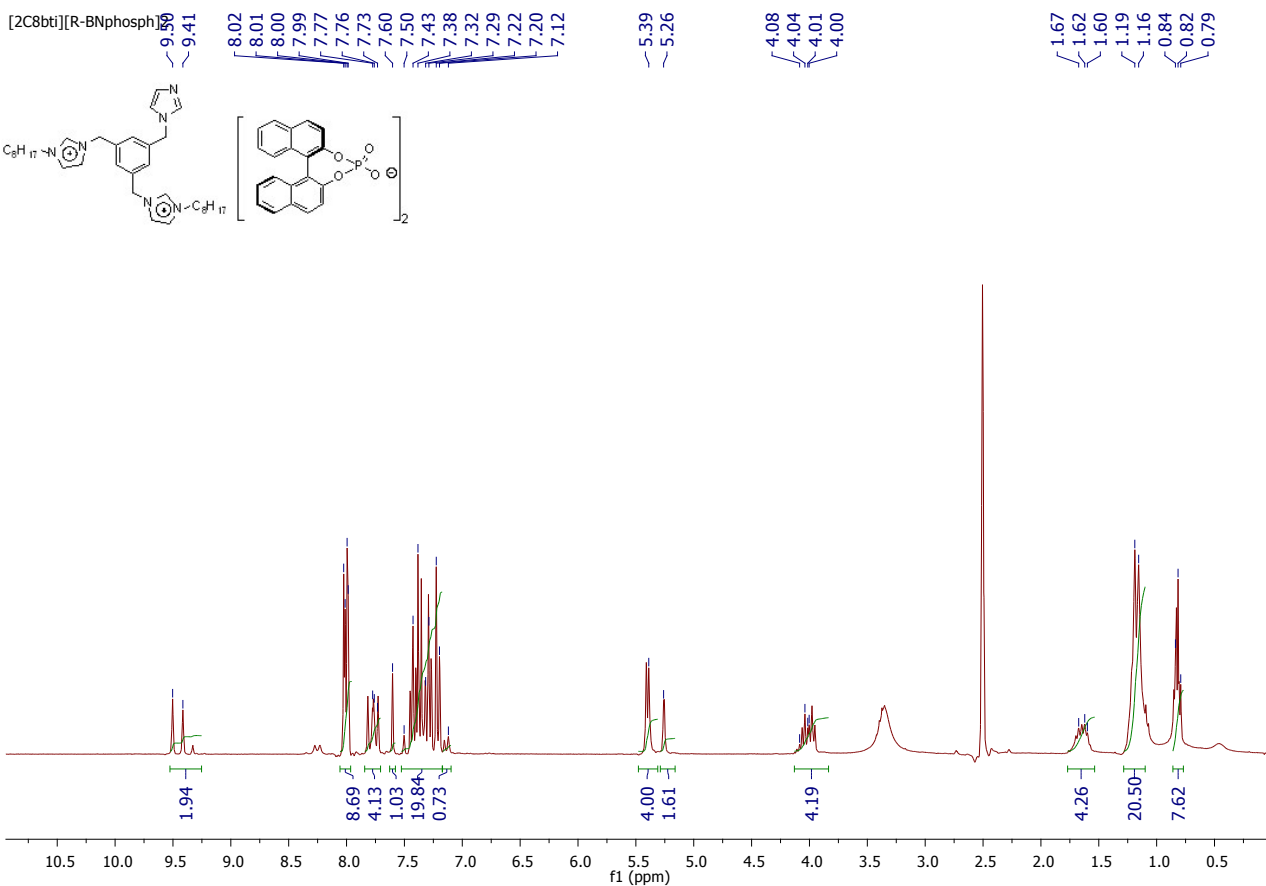

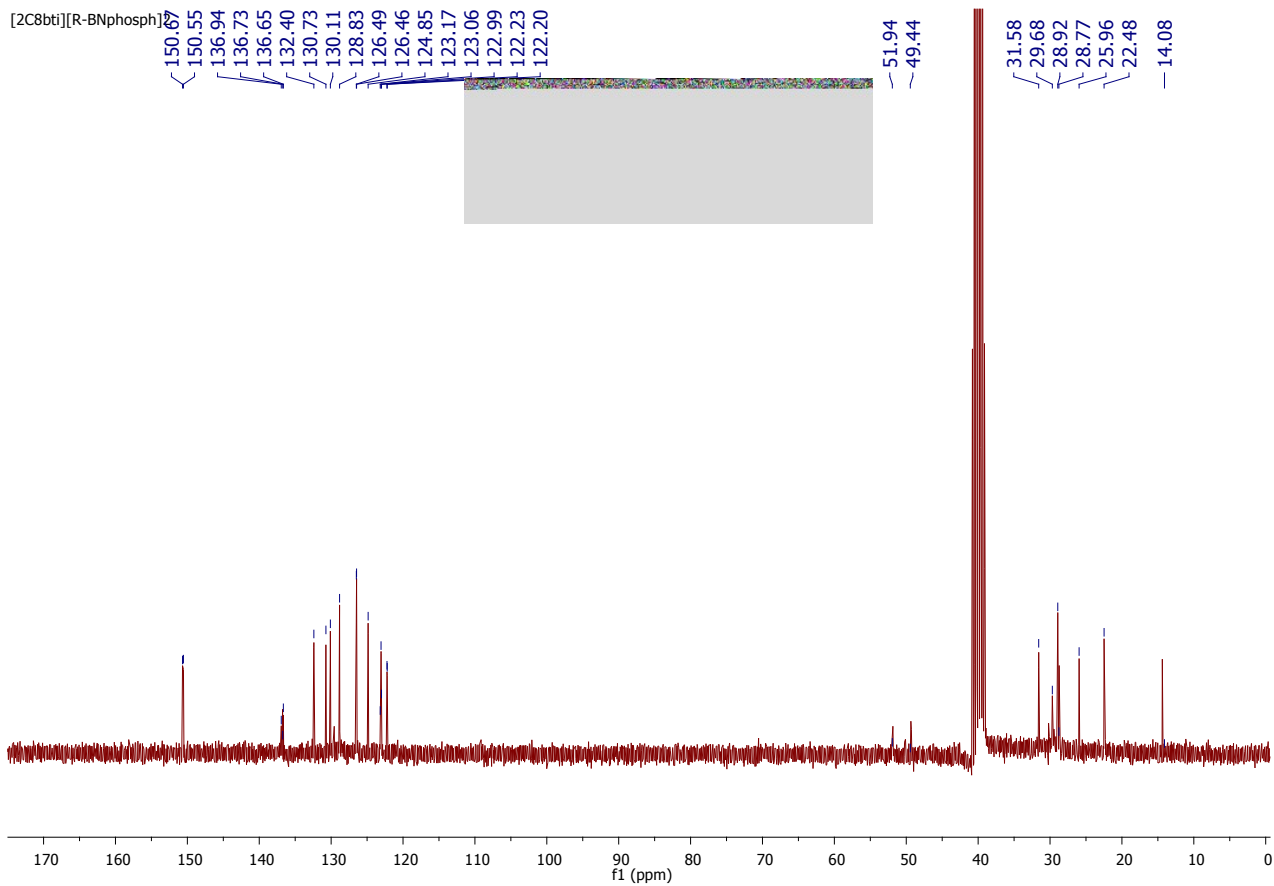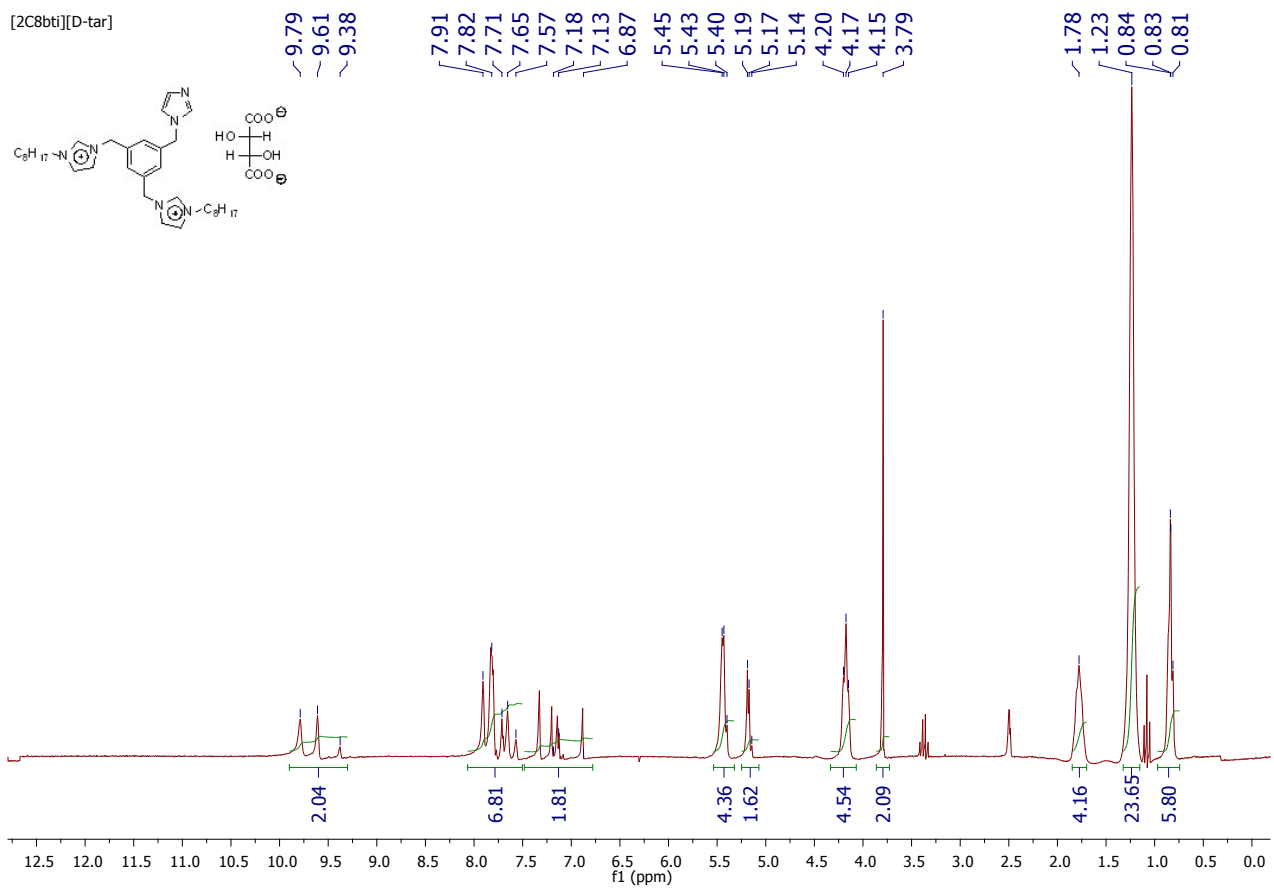

[2C8bti][D-tar]

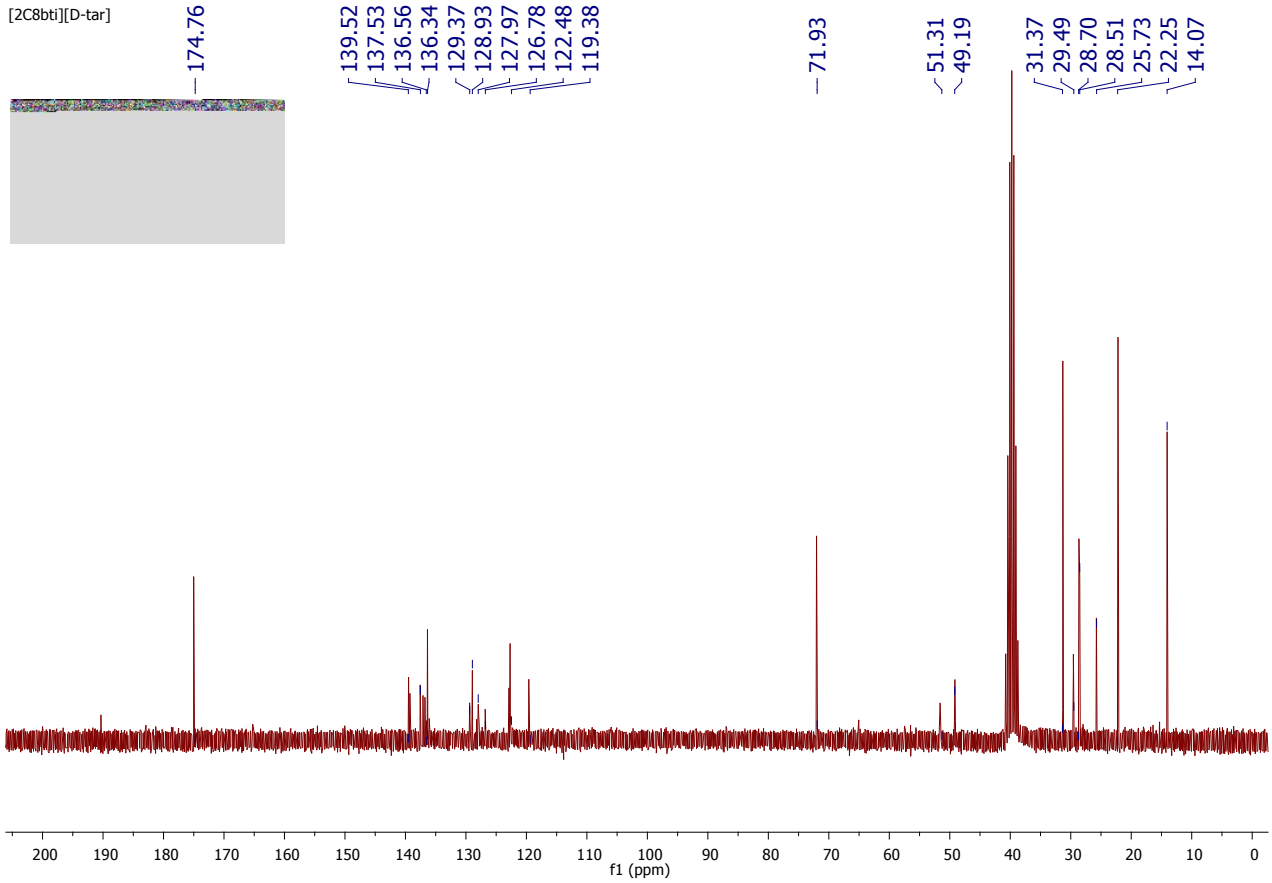

[2C8bti][L-tar]

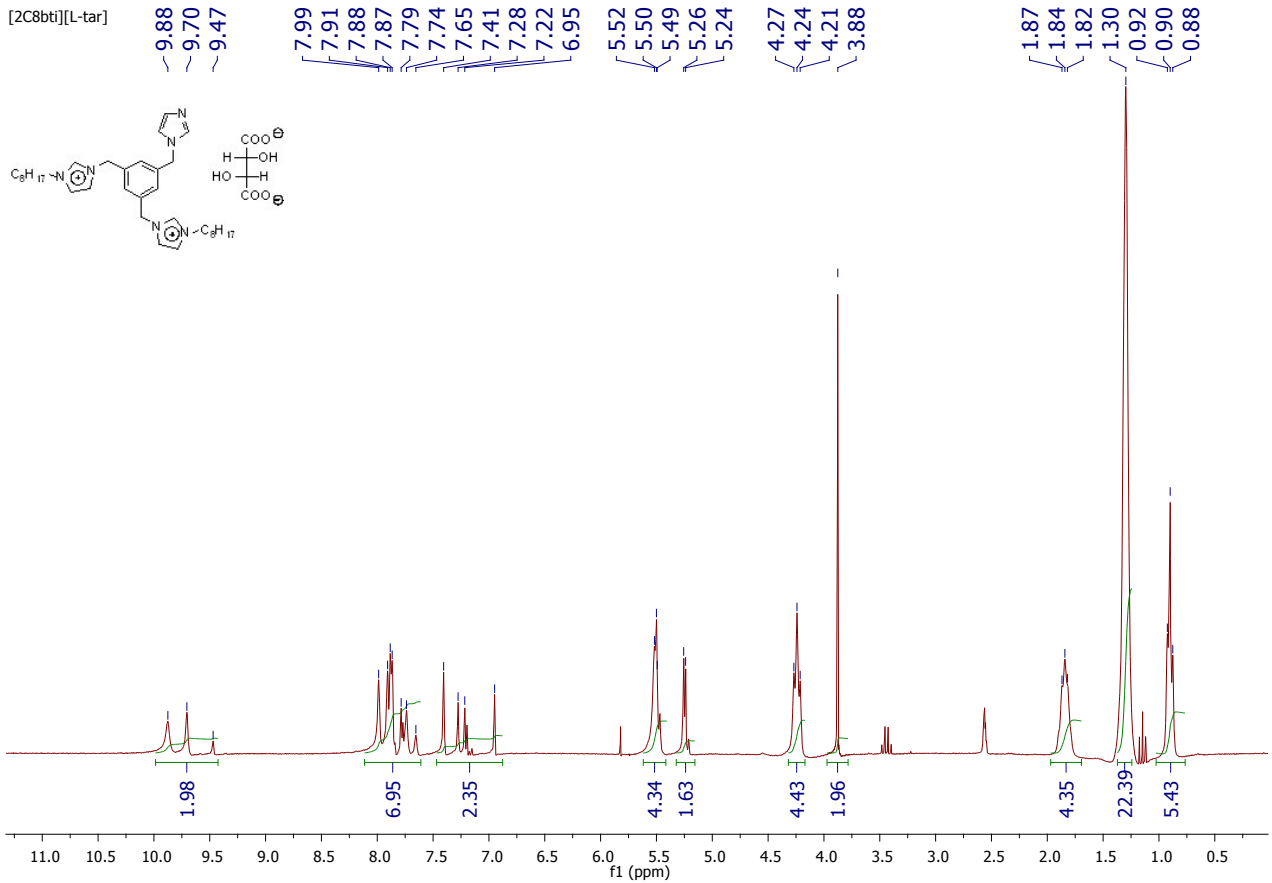

[2C8bti][L-tar]

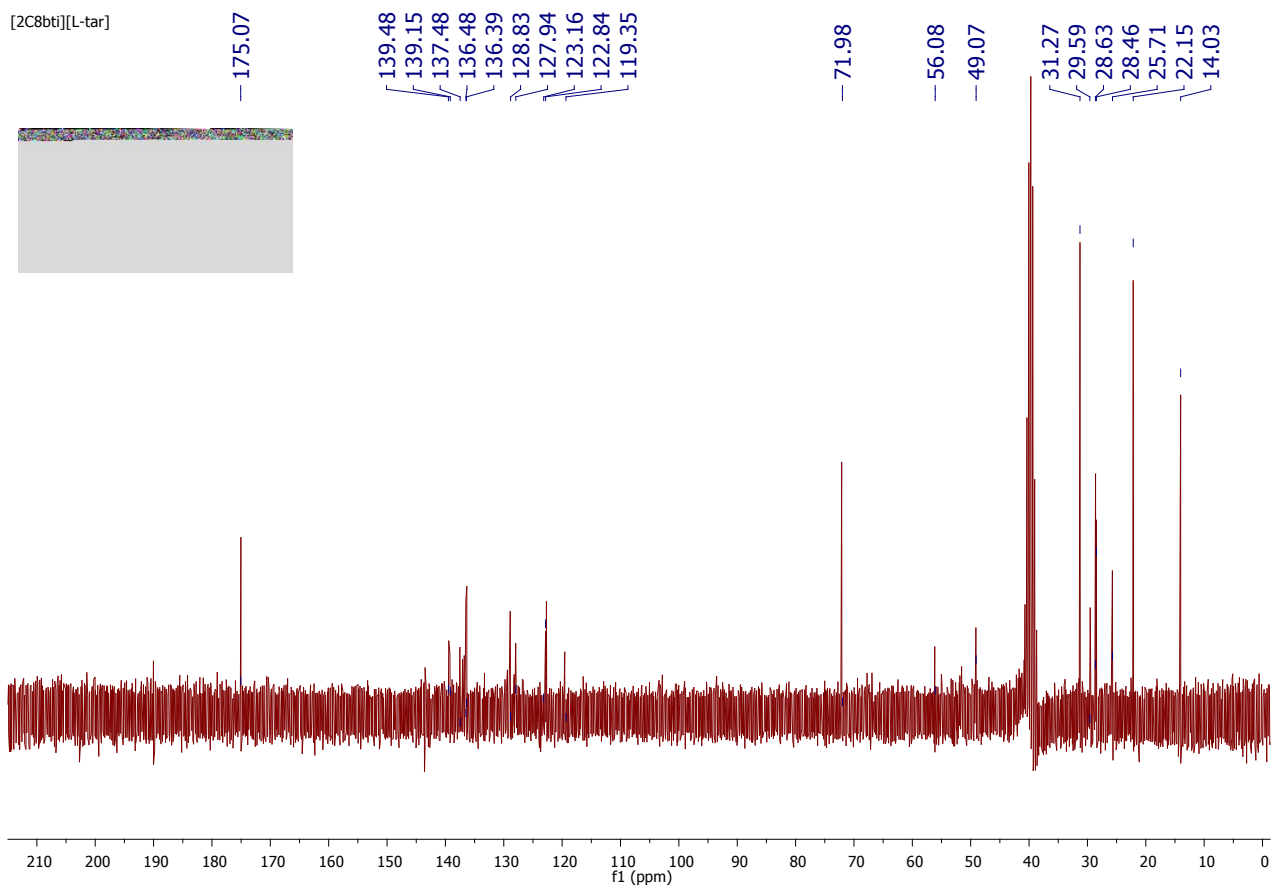

Supplement: c6ra12037g1.pdf [file c6ra12037g1.pdf]
